# Supplementary material
Source: Springer Nature journal article supplement (https://www.springermedizin.de/resource/supplementary/12879_2012_2033_MOESM3_ESM.pdf/9443452)

**A**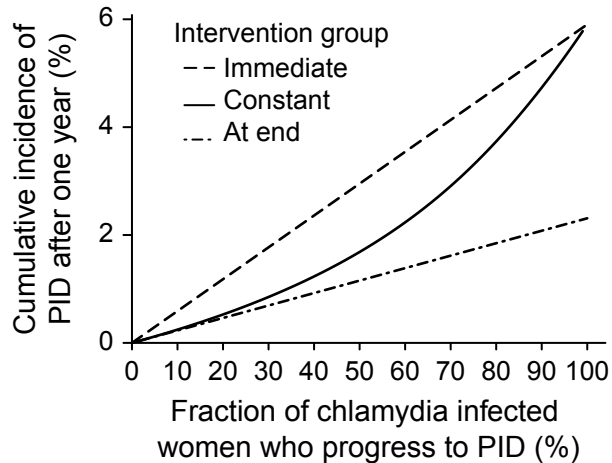**B**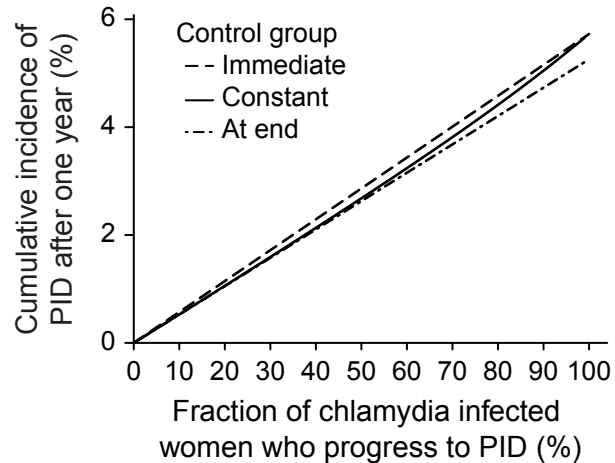

Supplement: MOESM3 [file 9443452]
